# Supplementary material
Source: PubMed Central journal article supplement (PMC5048381)

## Expanded View Figures

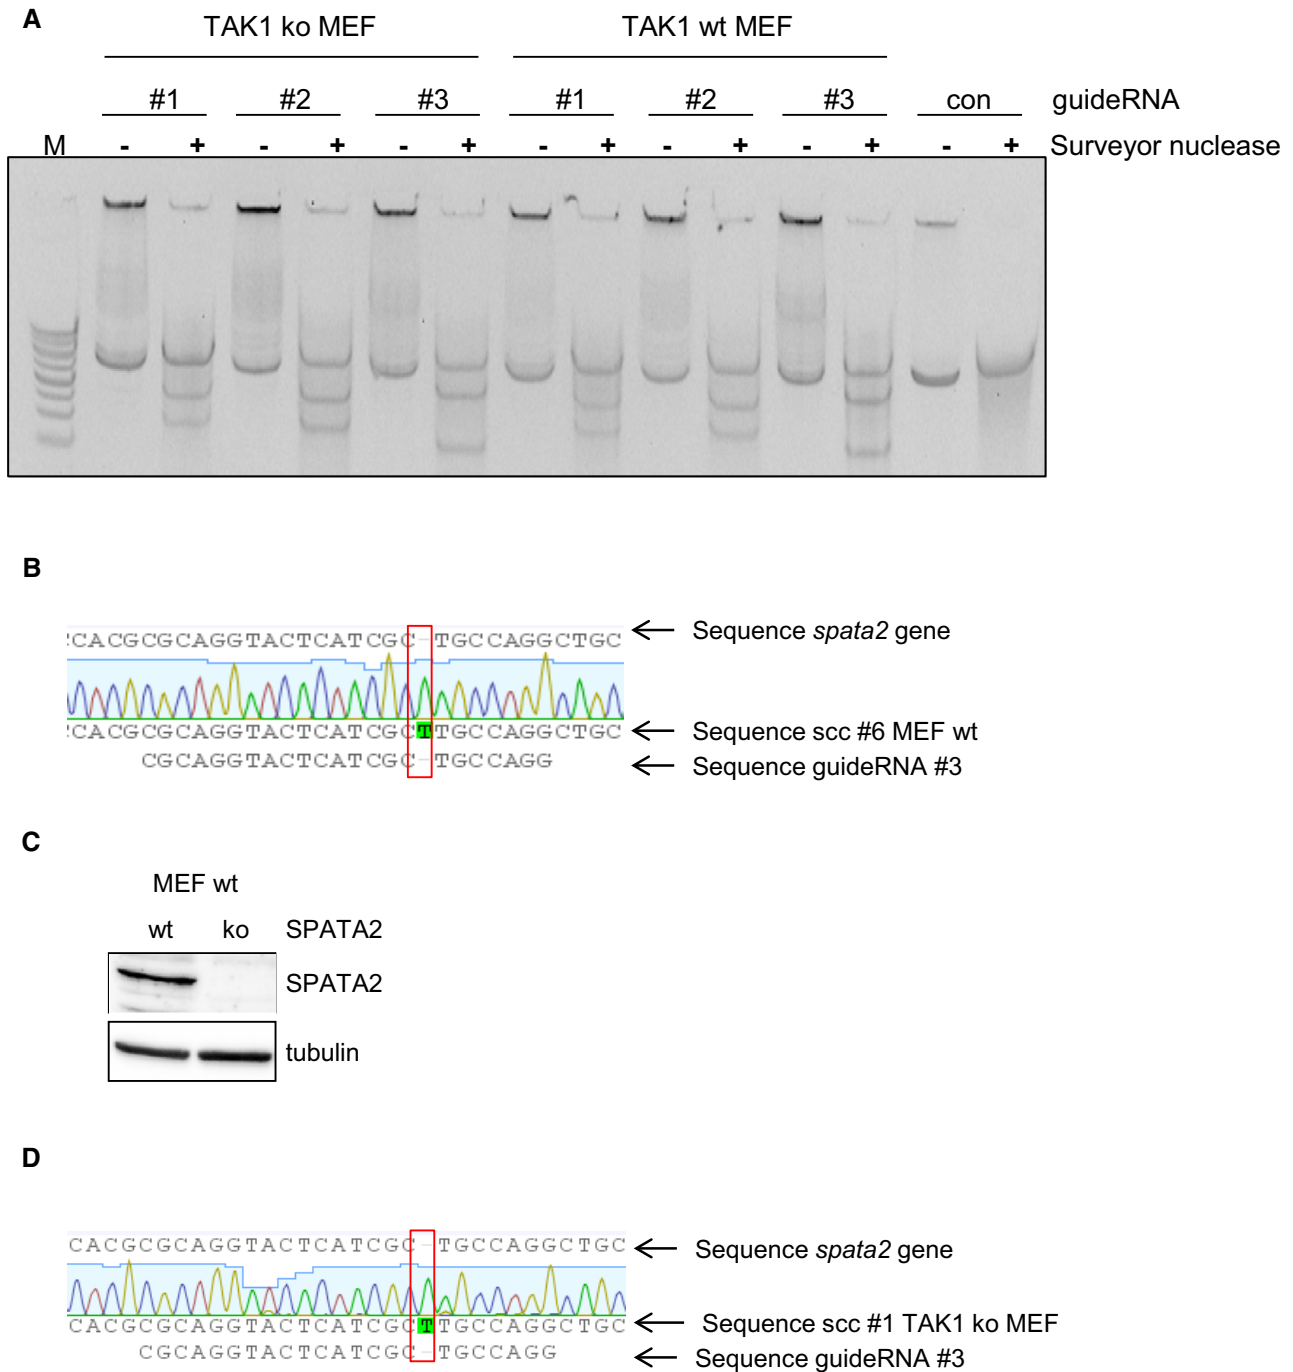

**Figure EV1. CRISPR/Cas9-mediated knockout of SPATA2 in wild-type and TAK1<sup>-/-</sup> MEFs.**

- A Surveyor assay shown for mixed cell cultures generated with different guide RNAs.
- B Sequencing of a single cell clone of wild-type MEFs, generated by CRISPR/Cas9 targeting the *Spata2* gene, with an identical deletion on both alleles, creating a premature STOP codon.
- C Western blotting of control cells generated by CRISPR/Cas9, targeting the Luciferase gene or a *Spata2* knockout clone of wild-type MEFs, as described in (A).
- D Sequencing of a single cell clone of TAK1<sup>-/-</sup> MEFs, generated by CRISPR/Cas9, targeting the *Spata2* gene, with an identical deletion on both alleles, creating a premature STOP codon.

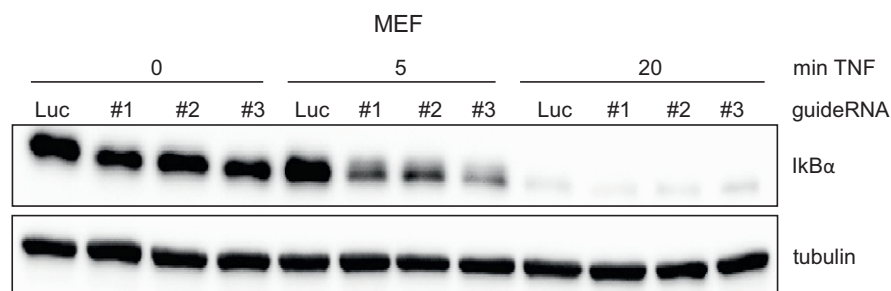

**Figure EV2. Increased IκBα degradation in various SPATA2 knockout clones generated with different guide RNAs.**

Control cells generated by CRISPR/Cas9 targeting the luciferase gene (Luc) or various SPATA2 knockout clones generated with different guide RNAs (#1–3) were treated with TNF (10 ng/ml) for the indicated time and IκBα degradation was assessed by Western blotting, followed by normalization with anti-tubulin.

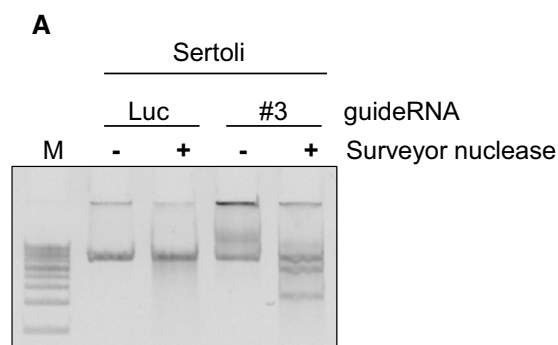

**Figure EV3. CRISPR/Cas9-mediated knockout of *Spata2* in 15P-1 Sertoli cells.**

A Surveyor assay shown for a mixed cell culture generated with guide RNA #3.  
 B Sequencing of a single cell clone, generated by CRISPR/Cas9, targeting the *Spata2* gene, with an identical deletion in both alleles, creating a premature STOP codon.

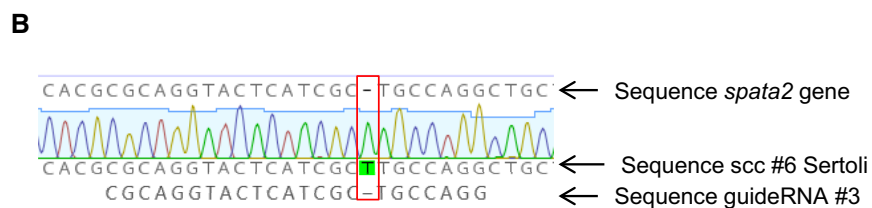

Supplement: EMBR-17-1485-s001.pdf [file EMBR-17-1485-s001.pdf]
